# Supplementary material for: Normal salivary gland ultrasonography could rule out the diagnosis of Sjögren’s syndrome in anti-SSA-negative patients with sicca syndrome
Source: HighWire-hosted journal article supplement (doi:10.1136/rmdopen-2020-001503), 2021-01-01
Supplement: rmdopen-2020-001503supp001_data_supplement.pdf [file rmdopen-2020-001503supp001_data_supplement.pdf]

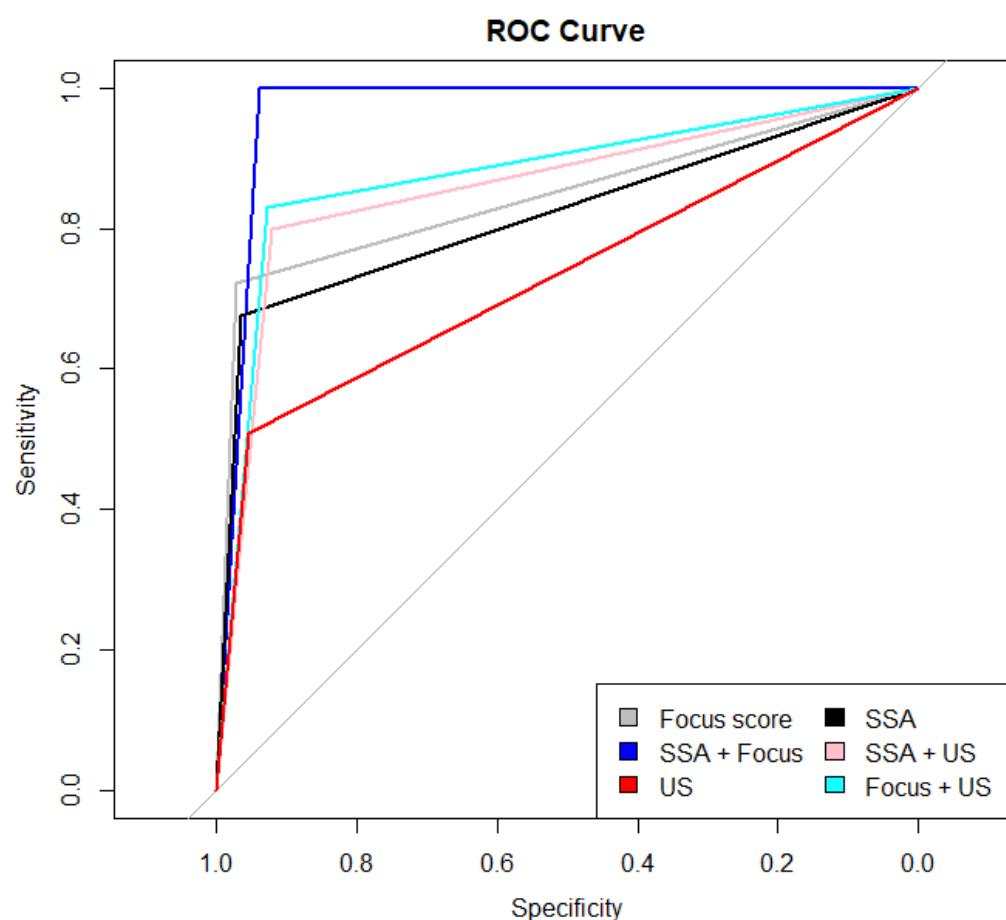

**Fig. S1:** ROC curve for SS diagnosis, with the two worst salivary glands  
*US score  $\geq 2$  as cutoff value*

Sensitivity / specificity:

- Focus score : 72.3% / 97.2% (AUC: 0.85, 95% CI [0.79-0.9])
- SSA : 67.7% / 96.7% (AUC: 0.82, 95% CI [0.76-0.9])
- SSA + Focus score : 100% / 93.9% (AUC: 0.97, 95% CI [0.95-0.9])
- US : 50.8% / 95.5% (AUC: 0.73, 95% CI [0.67-0.79])
- US + SSA : 80% / 92.2% (AUC: 0.86, 95% CI [0.81-0.91])
- US + Focus score : 83.1% / 92.7% (AUC: 0.88, 95% CI [0.83-0.93])
