# Supplementary material for: Normal salivary gland ultrasonography could rule out the diagnosis of Sjögren’s syndrome in anti-SSA-negative patients with sicca syndrome
Source: HighWire-hosted journal article supplement (doi:10.1136/rmdopen-2020-001503), 2021-01-01
Supplement: rmdopen-2020-001503supp002_data_supplement.pdf [file rmdopen-2020-001503supp002_data_supplement.pdf]

| <b>TABLE S1: PATIENTS' CHARACTERISTICS</b>      |                       |                      |                                    |                    |
|-------------------------------------------------|-----------------------|----------------------|------------------------------------|--------------------|
|                                                 | <b>SS<br/>(N= 77)</b> | <b>SAPS (N= 132)</b> | <b>Other diagnosis<br/>(N= 60)</b> | <b>p</b>           |
| Age (years), mean (SD)                          | 55 (14.3)             | 55 (14.1)            | 57 (16.1)                          | 0.8                |
| Gender (women), n (%)                           | 69 (90%)              | 119 (90%)            | 53 (88%)                           | 0.45               |
| Sicca syndrome duration (years), mean (SD)      | 4.9 (5.2)             | 6 (6.1)              | 6.7 (6.8)                          | 0.09               |
| Tobacco consumption, n (%)                      | 25 (33%)              | 49 (37%)             | 19 (32%)                           | 0.75               |
| Personal history of auto-immune disease, n (%)  | 15 (20%)              | 20 (15%)             | 14 (23%)                           | 0.87               |
| Familial history of auto-immune disease, n (%)  | 14 (18%)              | 31 (24%)             | 10 (17%)                           | 0.7                |
| <b>Use of dry mouth treatment, n (%)</b>        | <b>13 (17%)</b>       | <b>41 (31%)</b>      | <b>20 (33%)</b>                    | <b>0.02</b>        |
| Body Mass Index (kg/m <sup>2</sup> ), mean (SD) | 25.4 (5.7)            | 24.4 (4.6)           | 23.7 (4.6)                         | 0.09               |
| Raynaud phenomenon, n (%)                       | 20 (26%)              | 27 (21%)             | 13 (22%)                           | 0.45               |
| Arthralgia, n (%)                               | 53 (69%)              | 102 (77%)            | 39 (65%)                           | 0.54               |
| Previous history of lymphoma, n (%)             | 2 (3%)                | 1 (1%)               | 0 (0%)                             | 0.41               |
| <b>Parotitis, n (%)</b>                         | <b>26 (34%)</b>       | <b>7 (5%)</b>        | <b>12 (20%)</b>                    | <b>&lt; 0.0001</b> |
| <b>Objective buccal sicca syndrome*, n (%)</b>  | <b>40 (52%)</b>       | <b>40 (30%)</b>      | <b>19 (32%)</b>                    | <b>0.002</b>       |
| <b>Objective eye sicca syndrome**, n (%)</b>    | <b>61 (79%)</b>       | <b>68 (52%)</b>      | <b>34 (57%)</b>                    | <b>&lt; 0.001</b>  |
| ESSPRI, (0-100) mean (SD)                       | 58 (21)               | /                    | /                                  | /                  |
| ESSDAI $\geq$ 5, n (%)                          | 2 (2)                 | /                    | /                                  | /                  |
| <b>ANA positivity, n (%)</b>                    | <b>60 (78%)</b>       | <b>41 (31%)</b>      | <b>26 (43%)</b>                    | <b>&lt; 0.0001</b> |
| <b>SSA positivity, n (%)</b>                    | <b>50 (65%)</b>       | <b>4 (3%)</b>        | <b>0 (0%)</b>                      | <b>&lt; 0.0001</b> |
| <b>SSB positivity, n (%)</b>                    | <b>20 (26%)</b>       | <b>1 (1%)</b>        | <b>0 (0%)</b>                      | <b>&lt; 0.0001</b> |
| <b>RF positivity, n (%)</b>                     | <b>26 (34%)</b>       | <b>6 (5%)</b>        | <b>9 (15%)</b>                     | <b>&lt; 0.0001</b> |
| ACPA positivity, n (%)                          | 6 (8%)                | 1 (1%)               | 6 (10%)                            | 0.26               |
| C3 (g/L), mean (SD)                             | 1.1 (0.2)             | 1.1 (0.2)            | 1.1 (0.3)                          | 0.30               |
| <b>C4 (g/L), mean (SD)</b>                      | <b>0.2 (0.1)</b>      | <b>0.3 (0.2)</b>     | <b>0.2 (0.1)</b>                   | <b>0.009</b>       |
| <b>IgG (g/L), mean (SD)</b>                     | <b>14.6 (4.7)</b>     | <b>10.4 (2.2)</b>    | <b>12 (4)</b>                      | <b>&lt; 0.0001</b> |
| <b>Chisholm <math>\geq</math> 3, n (%)</b>      | <b>53 (69%)</b>       | <b>3 (2%)</b>        | <b>1 (2%)</b>                      | <b>&lt; 0.0001</b> |
| <b>Focus score <math>\geq</math> 1, n (%)</b>   | <b>49/72 (68%)</b>    | <b>3 (2%)</b>        | <b>1 (2%)</b>                      | <b>&lt; 0.0001</b> |
| <b>US scores</b>                                |                       |                      |                                    |                    |

|                              |                 |                 |                 |                    |
|------------------------------|-----------------|-----------------|-----------------|--------------------|
| <b>Score 0, n (%)</b>        | <b>22 (29%)</b> | <b>77 (58%)</b> | <b>31 (52%)</b> | <b>&lt; 0.0001</b> |
| <b>Score 1, n (%)</b>        | <b>16 (21%)</b> | <b>48 (36%)</b> | <b>21 (35%)</b> | <b>0.02</b>        |
| Score 2, n (%)               | 6 (8%)          | 6 (5%)          | 4 (7%)          | 0.6                |
| <b>Score 3 and 3F, n (%)</b> | <b>33 (43%)</b> | <b>1 (1%)</b>   | <b>4 (7%)</b>   | <b>&lt; 0.0001</b> |

SS, Sjogren's Syndrome

NSDS, Non-Sjogren's Dry Syndrome

ANA, anti-nuclear antibodies

RF, rheumatoid factor

\*objectified by unstimulated salivary flow rate test

\*\* objectified by Schirmer's test
