# Supplementary material for: Normal salivary gland ultrasonography could rule out the diagnosis of Sjögren’s syndrome in anti-SSA-negative patients with sicca syndrome
Source: HighWire-hosted journal article supplement (doi:10.1136/rmdopen-2020-001503), 2021-01-01
Supplement: rmdopen-2020-001503supp003_data_supplement.pdf [file rmdopen-2020-001503supp003_data_supplement.pdf]

| <b>TABLE S2: CHARACTERISTICS OF PATIENTS WITH SGUS SCORES ON THE TWO WORST GLANDS</b> |                      |                         |                          |
|---------------------------------------------------------------------------------------|----------------------|-------------------------|--------------------------|
|                                                                                       | <b>SS</b><br>(N= 77) | <b>NSDS</b><br>(N= 192) | <b>p (SS vs. others)</b> |
| <b>US scores</b>                                                                      |                      |                         |                          |
| <b>Score 0, n (%)</b>                                                                 | <b>33 (47%)</b>      | <b>160 (83%)</b>        | <b>&lt; 0.0001</b>       |
| Score 1, n (%)                                                                        | 10 (13%)             | 23 (12%)                | 0.9                      |
| Score 2, n (%)                                                                        | 3 (4%)               | 5 (3%)                  | 0.8                      |
| <b>Score 3 and 3F, n (%)</b>                                                          | <b>31 (40%)</b>      | <b>4 (2%)</b>           | <b>&lt; 0.0001</b>       |
