# Supplementary material for: Normal salivary gland ultrasonography could rule out the diagnosis of Sjögren’s syndrome in anti-SSA-negative patients with sicca syndrome
Source: HighWire-hosted journal article supplement (doi:10.1136/rmdopen-2020-001503), 2021-01-01
Supplement: rmdopen-2020-001503supp004_data_supplement.pdf [file rmdopen-2020-001503supp004_data_supplement.pdf]

|                                         | <b>SGUS score</b> | <b>Se (%)</b> | <b>Sp (%)</b> | <b>PPV (%)</b> | <b>NPV (%)</b> |
|-----------------------------------------|-------------------|---------------|---------------|----------------|----------------|
| Whole cohort<br>N= 269                  | ≥ 2               | 51            | 96            | 79             | 81             |
|                                         | ≥ 3               | 40            | 98            | 89             | 80             |
|                                         | 3F                | 9             | 99            | 78             | 73             |
| Anti-SSA<br>negative patients<br>N= 215 | ≥ 2               | 50            | 95            | 50             | 91             |
